# Supplementary material
Source: Springer Nature journal article supplement (https://www.springermedizin.de/resource/supplementary/12913_2012_2272_MOESM2_ESM.pdf/9530362)

■ <50km ■ 50-100km ■ >100km

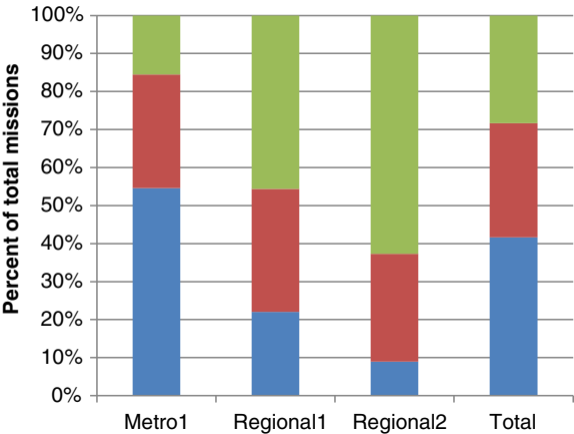

Supplement: MOESM2 [file 9530362]
